# Supplementary material
Source: ML conference proceedings conference paper supplement (https://openreview.net/forum?id=8MGDOQmYRo)

# Factorized Diffusion Policies for Conditional Action Diffusion

Omkar Patil<sup>1</sup>, Eric Rosen, Nakul Gopalan<sup>1</sup>

<sup>1</sup>School of Computing and Augmented Intelligence, ASU

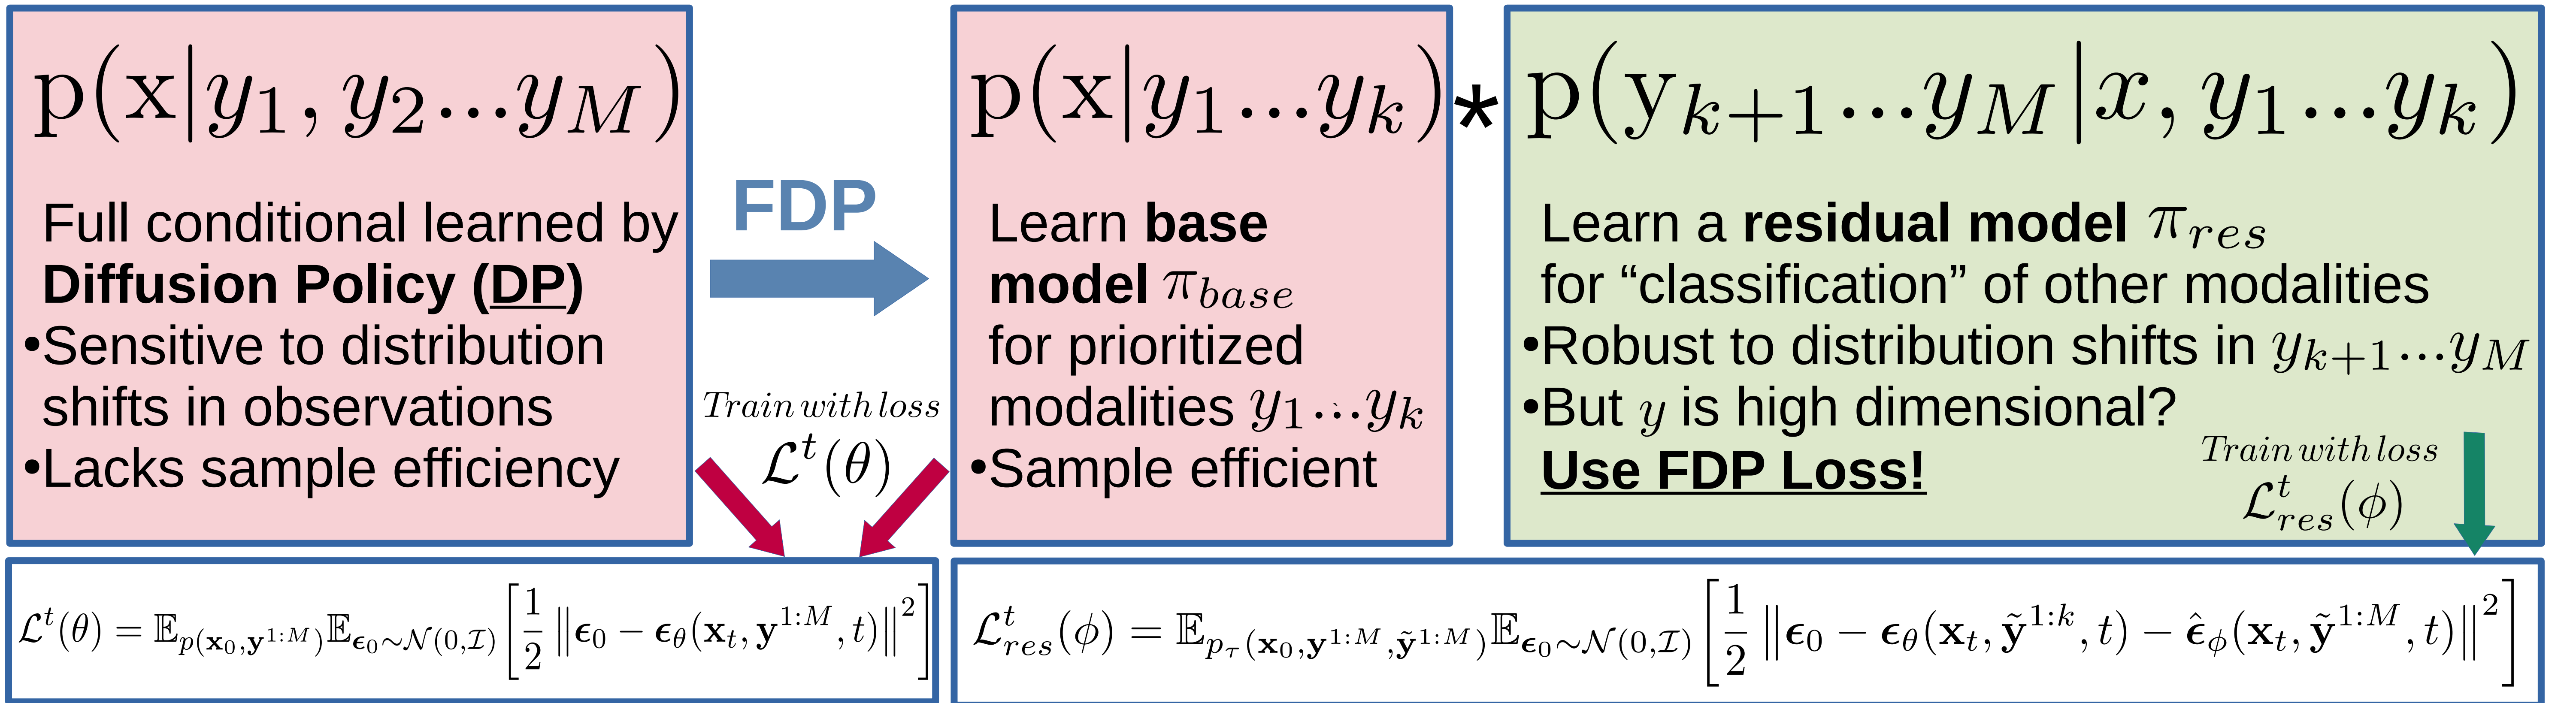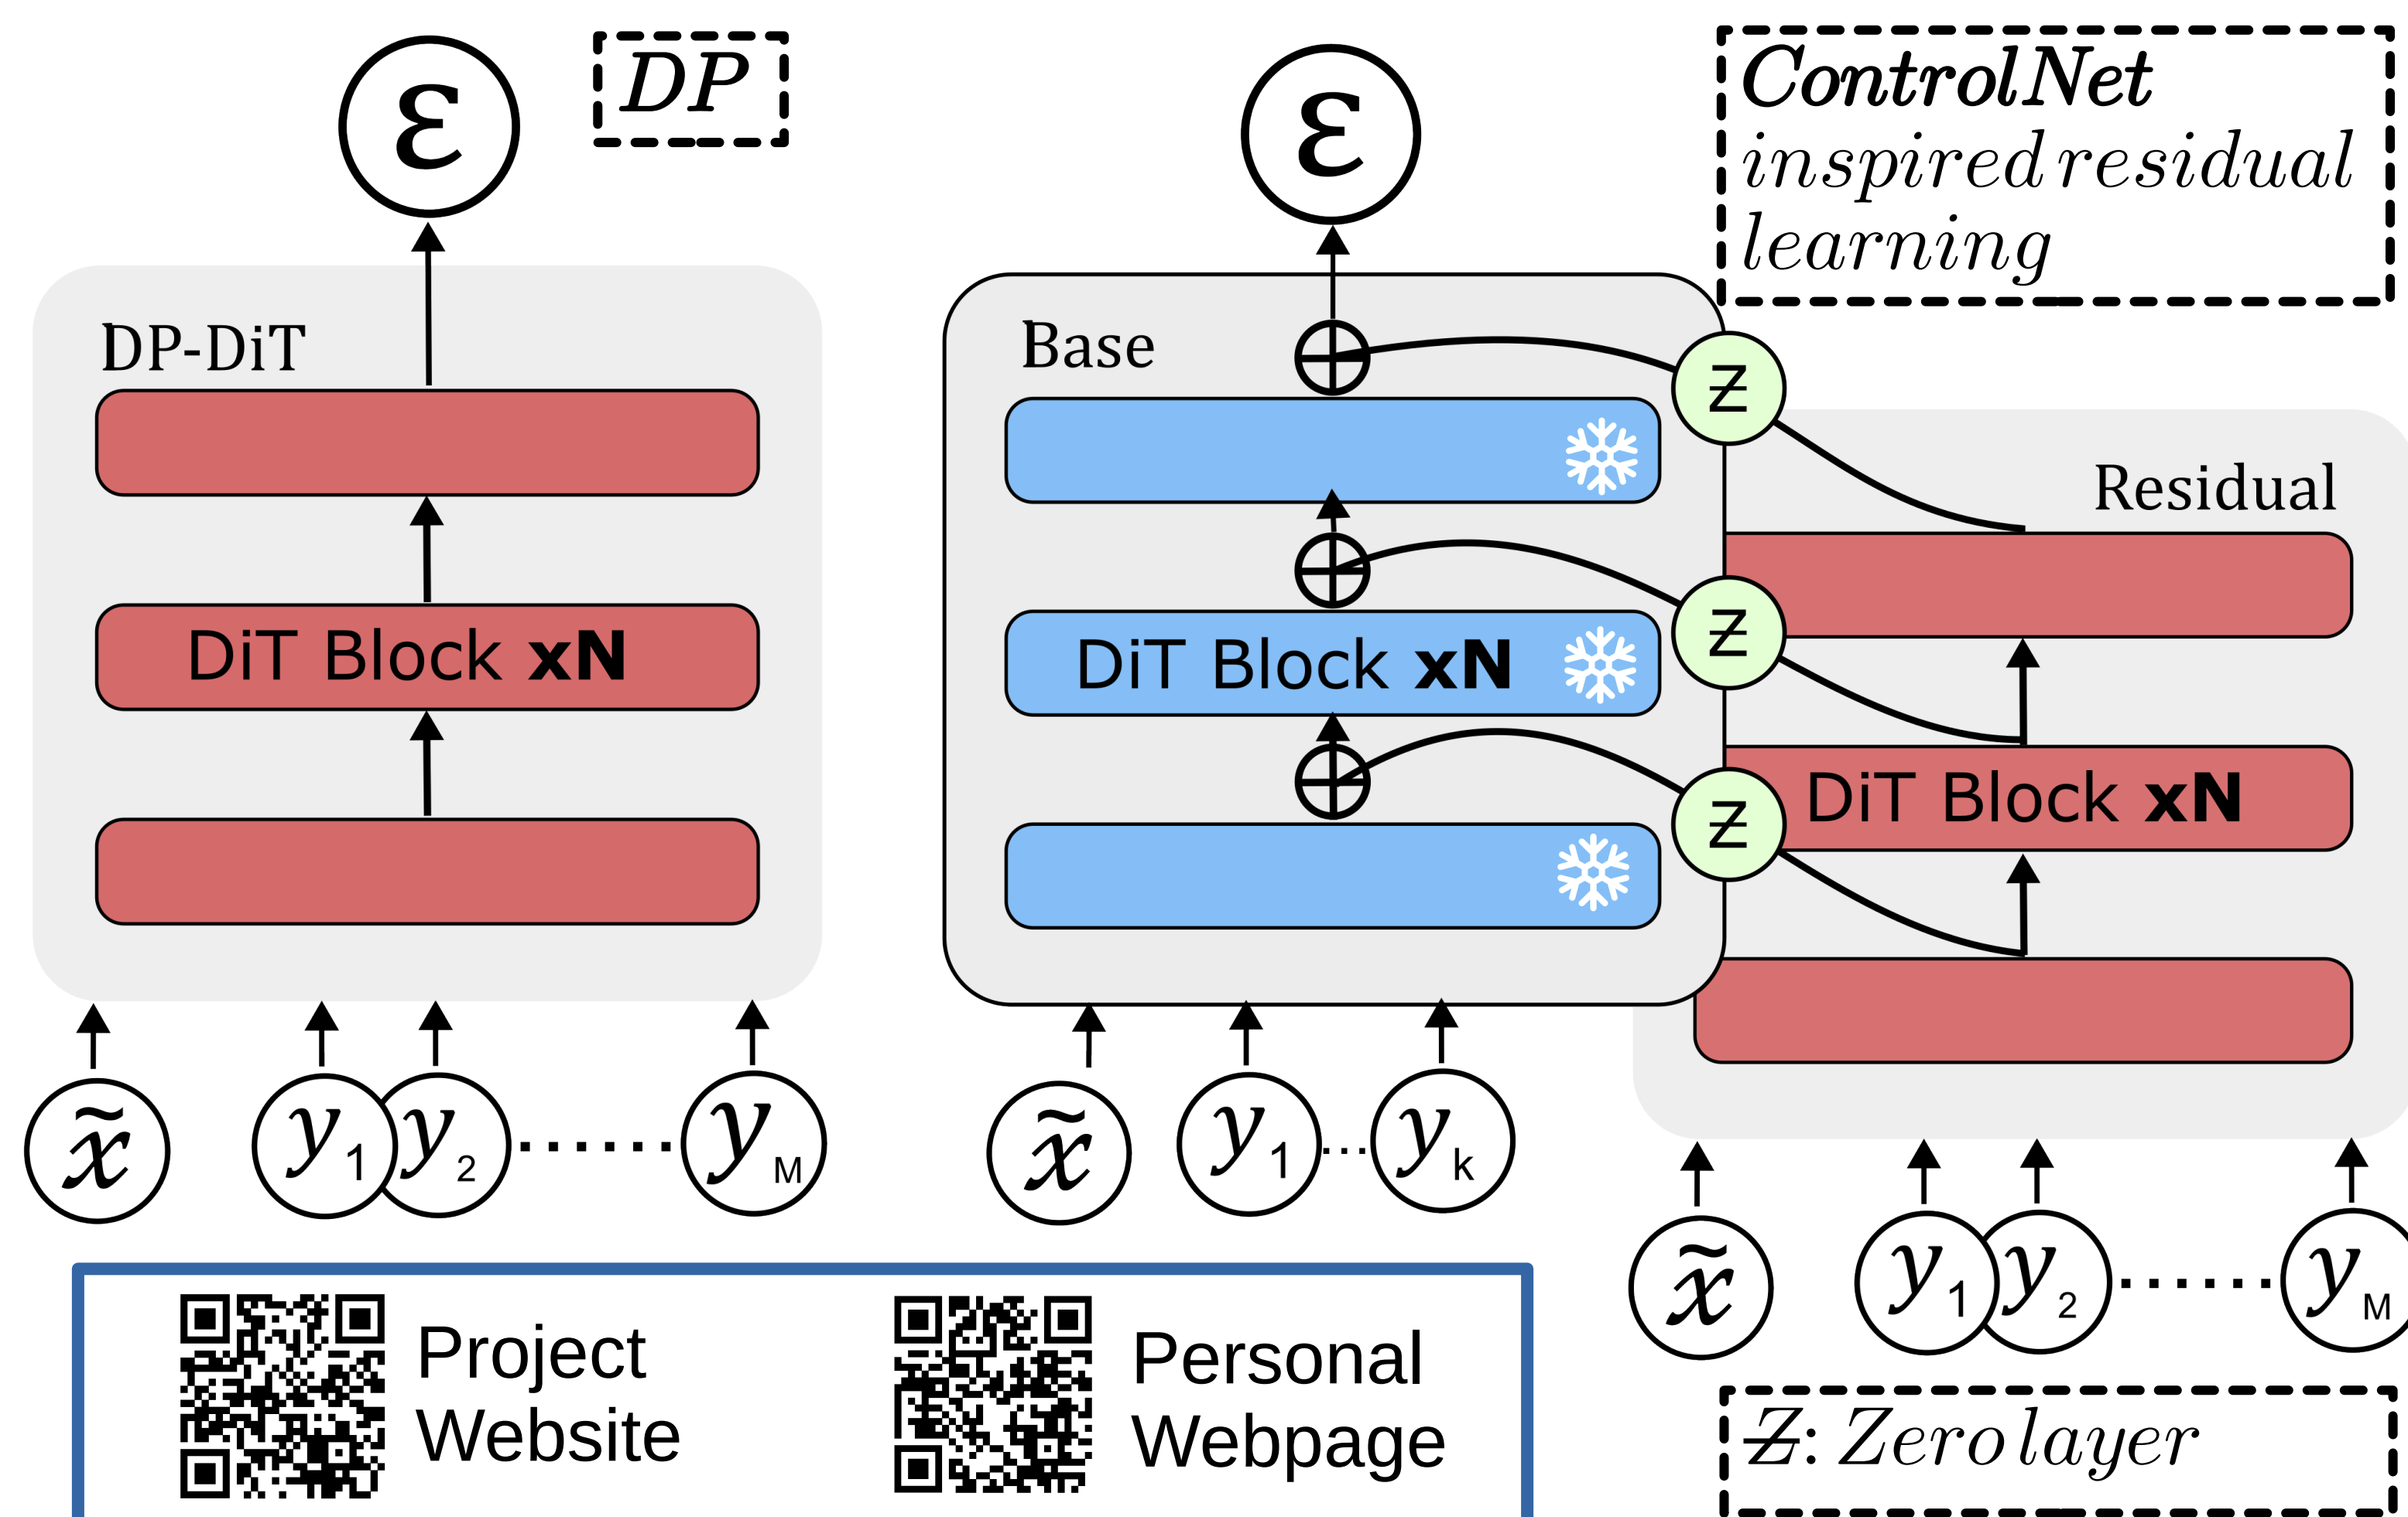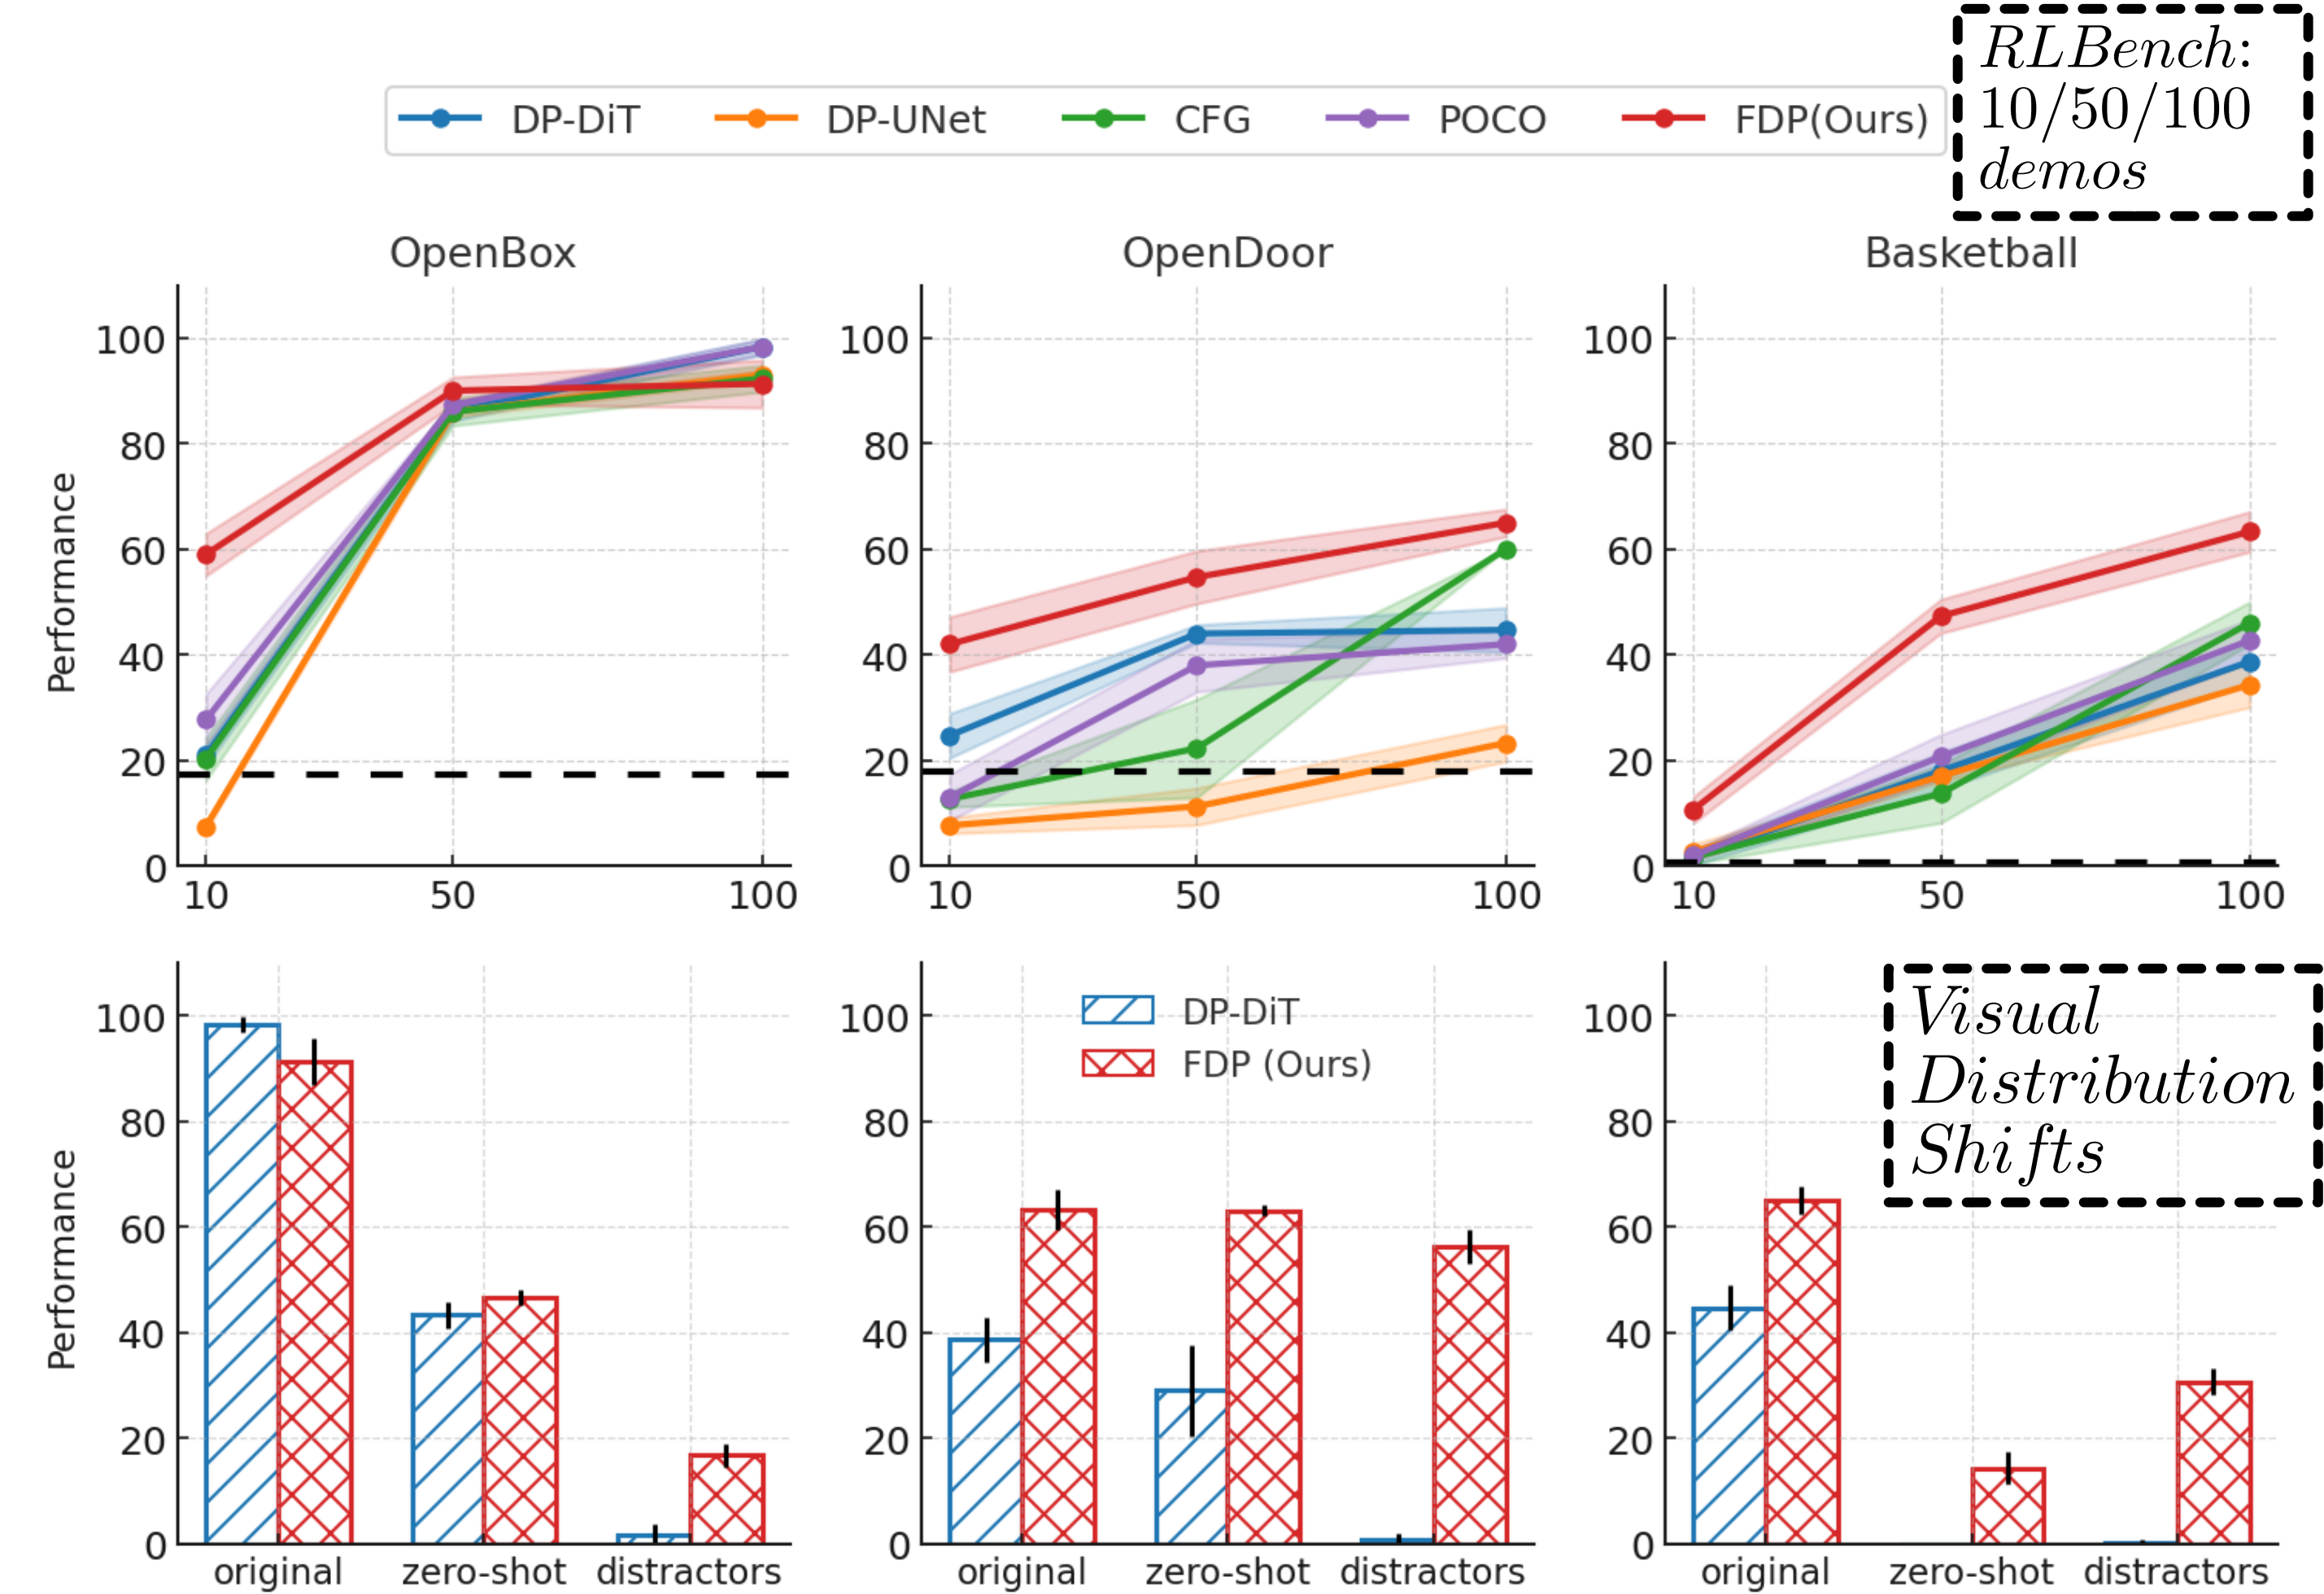

Supplement: supplementary_material [file attachment]
